# Supplementary material
Source: PubMed Central journal article supplement (PMC5272968)
Supplement: supp_WNL.0000000000003532_Appendices_e-1_through_e-5.pdf [file supp_WNL.0000000000003532_Appendices_e-1_through_e-5.pdf]

### **Appendix e-1. AAN GDDI mission**

The mission of the GDDI is to develop, disseminate, and implement evidence-based systematic reviews and clinical practice guidelines related to the causation, diagnosis, treatment, and prognosis of neurologic disorders.

The GDDI is committed to using the most rigorous methods available within its budget, in collaboration with other available AAN resources, to most efficiently accomplish this mission.

## **Appendix e-2. AAN GDDI members 2015–2017**

Cynthia Harden, MD (Chair); Steven R. Messé, MD (Co-Vice-Chair); Sonja Potrebic, MD, PhD; (Co-Vice-Chair); Eric J. Ashman, MD; Stephen Ashwal, MD; Brian Callaghan, MD; Jane Chan, MD; Gregory S. Day, MD, MSc; Diane Donley, MD; Richard M. Dubinsky, MD, MPH; Gary S. Gronseth, MD (Senior evidence-based medicine methodology expert); Jeffrey Fletcher, MD; Michael Haboubi, DO; John J. Halperin, MD; Yolanda Holler-Managan, MD; Annette M. Langer-Gould, MD, PhD; Nicole Licking, DO; David Michelson, MD; Pushpa Narayanaswami, MBBS, DM; Maryam Oskoui, MD; Alejandro A. Rabinstein, MD; Alexander Rae-Grant, MD; Kevin Sheth, MD; Kelly Sullivan, PhD; Jacqueline French, MD (Guideline Process Historian)

### Appendix e-3. Complete search strategy

#### *Original & Updated Searches*

Executed: May 2010; February 2015

Databases: EMBASE

fMRI Brain Surgery - EMBASE 1980 to 2010 Week 18; January 2010 to February 2015

| #  | Searches                                           | Results | Search Type |
|----|----------------------------------------------------|---------|-------------|
|    | fMRI Component                                     |         |             |
| 1  | nuclear magnetic resonance imaging/                | 244105  | Advanced    |
| 2  | functional magnetic resonance imaging/             | 13127   | Advanced    |
| 3  | echo planar imaging/                               | 823     | Advanced    |
| 4  | diffusion weighted imaging/                        | 7286    | Advanced    |
| 5  | interventional magnetic resonance imaging/         | 295     | Advanced    |
| 6  | nuclear magnetic resonance spectroscopy/           | 34569   | Advanced    |
| 7  | (function* adj2 MRI).mp.                           | 4043    | Advanced    |
| 8  | f-MRI.mp.                                          | 47      | Advanced    |
| 9  | fMRI.mp.                                           | 12159   | Advanced    |
| 10 | (function* adj2 MR imag*).mp.                      | 574     | Advanced    |
| 11 | (magnetic resonance adj2 imag*).mp.                | 269276  | Advanced    |
| 12 | (diffusion adj2 magnetic resonance adj2 imag*).mp. | 1478    | Advanced    |
| 13 | (echo planar adj2 imag*).mp.                       | 2007    | Advanced    |
| 14 | or/1-13                                            | 303698  | Advanced    |
|    | Brain Mapping Component                            |         |             |
| 15 | brain mapping/                                     | 10606   | Advanced    |
| 16 | ((brain or cortical) adj2 mapping).mp.             | 11058   | Advanced    |

|             |       |          |
|-------------|-------|----------|
| 17 or/15-16 | 11058 | Advanced |
|-------------|-------|----------|

Combined Results (fMRI & Brain Mapping)

|              |      |          |
|--------------|------|----------|
| 18 14 and 17 | 4484 | Advanced |
|--------------|------|----------|

Brain Tumour Component

|                 |       |          |
|-----------------|-------|----------|
| 19 brain tumor/ | 23857 | Advanced |
|-----------------|-------|----------|

|                           |     |          |
|---------------------------|-----|----------|
| 20 brain ventricle tumor/ | 576 | Advanced |
|---------------------------|-----|----------|

|                          |     |          |
|--------------------------|-----|----------|
| 21 choroid plexus tumor/ | 504 | Advanced |
|--------------------------|-----|----------|

|                              |     |          |
|------------------------------|-----|----------|
| 22 choroid plexus papilloma/ | 500 | Advanced |
|------------------------------|-----|----------|

|                      |      |          |
|----------------------|------|----------|
| 23 cerebellum tumor/ | 1210 | Advanced |
|----------------------|------|----------|

|                      |     |          |
|----------------------|-----|----------|
| 24 brain stem tumor/ | 904 | Advanced |
|----------------------|-----|----------|

|                      |      |          |
|----------------------|------|----------|
| 25 neuroepithelioma/ | 1420 | Advanced |
|----------------------|------|----------|

|                       |      |          |
|-----------------------|------|----------|
| 26 pineal body tumor/ | 1191 | Advanced |
|-----------------------|------|----------|

|                                                    |     |          |
|----------------------------------------------------|-----|----------|
| 27 hypothalamus tumor/ or pallister hall syndrome/ | 524 | Advanced |
|----------------------------------------------------|-----|----------|

|                      |      |          |
|----------------------|------|----------|
| 28 hypophysis tumor/ | 4715 | Advanced |
|----------------------|------|----------|

|            |       |          |
|------------|-------|----------|
| 29 glioma/ | 15553 | Advanced |
|------------|-------|----------|

|                    |      |          |
|--------------------|------|----------|
| 30 choroid plexus/ | 3272 | Advanced |
|--------------------|------|----------|

|                   |       |          |
|-------------------|-------|----------|
| 31 neuroblastoma/ | 13161 | Advanced |
|-------------------|-------|----------|

|                                            |       |          |
|--------------------------------------------|-------|----------|
| 32 (brain adj2 (neoplasm? or tumo?r?)).mp. | 33054 | Advanced |
|--------------------------------------------|-------|----------|

|                                                      |     |          |
|------------------------------------------------------|-----|----------|
| 33 (brain ventricle adj2 (neoplasm? or tumo?r?)).mp. | 638 | Advanced |
|------------------------------------------------------|-----|----------|

|                                                     |     |          |
|-----------------------------------------------------|-----|----------|
| 34 (choroid plexus adj2 (neoplasm? or tumo?r?)).mp. | 622 | Advanced |
|-----------------------------------------------------|-----|----------|

|                                        |     |          |
|----------------------------------------|-----|----------|
| 35 (choroid plexus adj2 papilloma).mp. | 598 | Advanced |
|----------------------------------------|-----|----------|

|                                                                     |      |          |
|---------------------------------------------------------------------|------|----------|
| 36 ((cerebellum or infratentorial) adj2 (neoplasm? or tumo?r?)).mp. | 1352 | Advanced |
|---------------------------------------------------------------------|------|----------|

|                                                 |      |          |
|-------------------------------------------------|------|----------|
| 37 (brain stem adj2 (neoplasm? or tumo?r?)).mp. | 1009 | Advanced |
|-------------------------------------------------|------|----------|

|    |                                                                      |       |          |
|----|----------------------------------------------------------------------|-------|----------|
| 38 | (cerebellar adj2 (neoplasm? or umo?r?)).mp.                          | 28    | Advanced |
| 39 | ((neurocystoma or neuroepithelioma) adj2 (neoplasm? or tumo?r?)).mp. | 26    | Advanced |
| 40 | ((pinealoma or pineal body) adj2 (neoplasm? or tumo?r?)).mp.         | 1209  | Advanced |
| 41 | (supratentorial adj2 (neoplasm? or tumo?r?)).mp.                     | 521   | Advanced |
| 42 | (hypothalam* adj2 (neoplasm? or tumo?r?)).mp.                        | 605   | Advanced |
| 43 | (pallister hall adj2 syndrome?).mp.                                  | 131   | Advanced |
| 44 | ((hypophysis or pituitary) adj2 (neoplasm? or tumo?r?)).mp.          | 7396  | Advanced |
| 45 | ((brain or cortical) adj2 malformation?).mp.                         | 8161  | Advanced |
| 46 | or/19-45                                                             | 76983 | Advanced |

#### Language Component

|    |                                                                                                                                              |       |          |
|----|----------------------------------------------------------------------------------------------------------------------------------------------|-------|----------|
| 47 | language/                                                                                                                                    | 18104 | Advanced |
| 48 | language*.tw.                                                                                                                                | 46427 | Advanced |
| 49 | speech/                                                                                                                                      | 11298 | Advanced |
| 50 | speech intelligibility/                                                                                                                      | 2127  | Advanced |
| 51 | speech*.tw.                                                                                                                                  | 31306 | Advanced |
| 52 | speech disorder/                                                                                                                             | 7867  | Advanced |
| 53 | aphasia/ or ataxic aphasia/ or conduction aphasia/ or cortical sensory aphasia/ or landau kleffner syndrome/ or primary progressive aphasia/ | 9144  | Advanced |
| 54 | dysarthria/                                                                                                                                  | 4608  | Advanced |
| 55 | echolalia/                                                                                                                                   | 202   | Advanced |
| 56 | mutism/                                                                                                                                      | 921   | Advanced |

|    |                                                                                        |        |          |
|----|----------------------------------------------------------------------------------------|--------|----------|
| 57 | stuttering/                                                                            | 1773   | Advanced |
| 58 | (aphasia* or (articulat* adj2 disorder?)).tw.                                          | 6909   | Advanced |
| 59 | dysarthria?.tw.                                                                        | 2796   | Advanced |
| 60 | echolalia?.tw.                                                                         | 124    | Advanced |
| 61 | mutism.tw.                                                                             | 984    | Advanced |
| 62 | stutter*.ti.                                                                           | 1454   | Advanced |
| 63 | stutter*.tw.                                                                           | 1886   | Advanced |
| 64 | language disability/ or agraphia/ or alexia/ or dysgraphia/ or dyslexia/ or dysphasia/ | 11941  | Advanced |
| 65 | anomia/                                                                                | 601    | Advanced |
| 66 | agraphia?.tw.                                                                          | 456    | Advanced |
| 67 | alexia*.tw.                                                                            | 511    | Advanced |
| 68 | dyslexia*.tw.                                                                          | 2153   | Advanced |
| 69 | dysgraphia?.tw.                                                                        | 211    | Advanced |
| 70 | dyslexia*.tw.                                                                          | 2153   | Advanced |
| 71 | dysphasia?.tw.                                                                         | 759    | Advanced |
| 72 | (landau kleffner adj2 syndrome?).tw.                                                   | 319    | Advanced |
| 73 | or/47-72                                                                               | 100352 | Advanced |

#### Brain Surgery Component

|    |                                  |        |          |
|----|----------------------------------|--------|----------|
| 74 | exp neurosurgery/                | 104069 | Advanced |
| 75 | exp brain surgery/               | 23228  | Advanced |
| 76 | (neurosurg* adj2 procedure?).mp. | 1669   | Advanced |
| 77 | (brain adj2 surger*).tw.         | 976    | Advanced |
| 78 | or/74-77                         | 104961 | Advanced |

Combined Results (fMRI & Brain Tumour & Language & Brain Surgery)

79 14 and 46 and 73 and 78 207 Advanced

Combined Results (fMRI & Brain Mapping & Language & Brain Surgery)

80 18 and 73 and 78 107 Advanced

Memory Component

81 exp memory/ 82529 Advanced

82 deja vu/ 109 Advanced

83 (memory or memories).mp. 115430 Advanced

84 deja vu.mp. 335 Advanced

85 (mental adj2 recall).mp. 28 Advanced

86 (recognition or retention).mp. 246732 Advanced

87 or/81-86 348017 Advanced

Combined Results (fMRI & Brain Mapping & Brain Surgery & Memory)

88 18 and 78 and 87 22 Advanced

Combined results (fMRI & Brain Tumour & Brain Surgery & Memory)

89 14 and 46 and 78 and 87 136 Advanced

Combined all combined results limited to 1990- Current, human, and removed editorial, letter, note and reviews

90 79 or 80 or 88 or 89 374 Advanced

91 exp animals/ not (exp animals/ and exp humans/) 31153 Advanced

92 90 not 91 374 Advanced

93 limit 92 to yr="1990 -Current" 374 Advanced

94 limit 93 to (editorial or letter or note or "review") 64 Advanced

95 93 not 94 310 Advanced

### *Original & Updated Searches*

Executed: July 2010; February 2015

Databases: EMBASE

fMRI Epilepsy - EMBASE 1980 to 2010 Week 26; January 2010 to February 2015

| #                  | Searches                               | Results | Search Type |
|--------------------|----------------------------------------|---------|-------------|
| fMRI Component     |                                        |         |             |
| 1                  | functional magnetic resonance imaging/ | 13621   | Advanced    |
| 2                  | (function* adj2 imag*).mp.             | 11527   | Advanced    |
| 3                  | (function* adj2 MR imag*).mp.          | 581     | Advanced    |
| 4                  | (function* adj2 mri?).mp.              | 4133    | Advanced    |
| 5                  | fmri.mp.                               | 12459   | Advanced    |
| 6                  | f-mri.mp.                              | 49      | Advanced    |
| 7                  | or/1-6                                 | 28178   | Advanced    |
| Epilepsy Component |                                        |         |             |
| 8                  | epilepsy/                              | 46005   | Advanced    |
| 9                  | focal epilepsy/                        | 8183    | Advanced    |
| 10                 | temporal lobe epilepsy/                | 6729    | Advanced    |
| 11                 | frontal lobe epilepsy/                 | 1008    | Advanced    |
| 12                 | rolandic epilepsy/                     | 287     | Advanced    |
| 13                 | traumatic epilepsy/                    | 375     | Advanced    |
| 14                 | epilep*.mp.                            | 85734   | Advanced    |
| 15                 | seizure/                               | 50063   | Advanced    |
| 16                 | seizur*.mp.                            | 87588   | Advanced    |

|    |                                     |        |          |
|----|-------------------------------------|--------|----------|
| 17 | convulsion/                         | 13924  | Advanced |
| 18 | convuls*.mp.                        | 26420  | Advanced |
| 19 | "seizure, epilepsy and convulsion"/ | 68     | Advanced |
| 20 | or/8-19                             | 144760 | Advanced |

#### Wada Test Component

|    |                                     |       |          |
|----|-------------------------------------|-------|----------|
| 21 | wada test/                          | 309   | Advanced |
| 22 | wada*.mp.                           | 866   | Advanced |
| 23 | amobarbital/                        | 2080  | Advanced |
| 24 | amobarbital*.mp.                    | 2232  | Advanced |
| 25 | amytal*.mp.                         | 490   | Advanced |
| 26 | neurologic examination/             | 24010 | Advanced |
| 27 | (neurologic* adj2 examination*).mp. | 28577 | Advanced |
| 28 | neuropsychological test/            | 18026 | Advanced |
| 29 | (neuropsychologic* adj2 test?).mp.  | 20320 | Advanced |
| 30 | or/21-29                            | 50718 | Advanced |

#### Language Component

|    |                      |       |          |
|----|----------------------|-------|----------|
| 31 | language/            | 18434 | Advanced |
| 32 | language disability/ | 6658  | Advanced |
| 33 | agraphia/            | 462   | Advanced |
| 34 | anomia/              | 608   | Advanced |
| 35 | dyslexia/            | 3875  | Advanced |
| 36 | alexia/              | 679   | Advanced |
| 37 | language test/       | 1008  | Advanced |

|    |                                   |       |          |
|----|-----------------------------------|-------|----------|
| 38 | (vocabulary adj2 test?).mp.       | 375   | Advanced |
| 39 | language*.mp.                     | 61430 | Advanced |
| 40 | agraphia*.mp.                     | 587   | Advanced |
| 41 | anomia*.mp.                       | 729   | Advanced |
| 42 | dyslexia*.mp.                     | 4057  | Advanced |
| 43 | alexia*.mp.                       | 805   | Advanced |
| 44 | speech/                           | 11461 | Advanced |
| 45 | speech disorder/                  | 8003  | Advanced |
| 46 | speech analysis/                  | 2606  | Advanced |
| 47 | "speech and language assessment"/ | 216   | Advanced |
| 48 | "speech and language"/            | 161   | Advanced |
| 49 | speech*.mp.                       | 47096 | Advanced |
| 50 | aphasia/                          | 7807  | Advanced |
| 51 | ataxic aphasia/                   | 867   | Advanced |
| 52 | conduction aphasia/               | 154   | Advanced |
| 53 | cortical sensory aphasia/         | 461   | Advanced |
| 54 | primary progressive aphasia/      | 295   | Advanced |
| 55 | progressive nonfluent aphasia/    | 67    | Advanced |
| 56 | dysarthria/                       | 4703  | Advanced |
| 57 | echolalia/                        | 206   | Advanced |
| 58 | mutism/                           | 925   | Advanced |
| 59 | stuttering/                       | 1782  | Advanced |
| 60 | cluttering/                       | 43    | Advanced |

|    |                                 |        |          |
|----|---------------------------------|--------|----------|
| 61 | dysphasia/                      | 1077   | Advanced |
| 62 | dysphonia/                      | 3465   | Advanced |
| 63 | fluency disorder/               | 290    | Advanced |
| 64 | logorrhea/                      | 73     | Advanced |
| 65 | slurred speech/                 | 995    | Advanced |
| 66 | aphasia*.mp.                    | 10249  | Advanced |
| 67 | dysarthria*.mp.                 | 5554   | Advanced |
| 68 | echolalia*.mp.                  | 258    | Advanced |
| 69 | mutis*.mp.                      | 1604   | Advanced |
| 70 | stutter*.mp.                    | 2138   | Advanced |
| 71 | clutter*.mp.                    | 481    | Advanced |
| 72 | dysphasia*.mp.                  | 1383   | Advanced |
| 73 | dysphonia*.mp.                  | 3920   | Advanced |
| 74 | (fluency adj2 disorder?).mp.    | 331    | Advanced |
| 75 | (articulat* adj2 disorder?).mp. | 159    | Advanced |
| 76 | (verbal adj2 disorder?).mp.     | 96     | Advanced |
| 77 | logorrhea*.mp.                  | 83     | Advanced |
| 78 | slurred*.mp.                    | 1172   | Advanced |
| 79 | verbal behavior/                | 3977   | Advanced |
| 80 | (verbal adj2 behavio?r?).mp.    | 4276   | Advanced |
| 81 | or/31-80                        | 117559 | Advanced |

#### Memory Component

|    |         |       |          |
|----|---------|-------|----------|
| 82 | memory/ | 40225 | Advanced |
|----|---------|-------|----------|

|    |                          |        |          |
|----|--------------------------|--------|----------|
| 83 | short term memory/       | 4693   | Advanced |
| 84 | recall/                  | 9801   | Advanced |
| 85 | recognition/             | 9518   | Advanced |
| 86 | deja vu/                 | 113    | Advanced |
| 87 | (memory or memories).mp. | 117635 | Advanced |
| 88 | recall?.mp.              | 25605  | Advanced |
| 89 | recognition?.mp.         | 164603 | Advanced |
| 90 | or/82-89                 | 283962 | Advanced |
| 91 | 30 or 81 or 90           | 420855 | Advanced |

Combined Results limited to humans, 1990-Current, excluded

Editorial, letter, and review

|    |                                                 |       |          |
|----|-------------------------------------------------|-------|----------|
| 92 | 7 and 20 and 91                                 | 534   | Advanced |
| 93 | exp animals/ not (exp animals/ and exp humans/) | 38451 | Advanced |
| 94 | 92 not 93                                       | 534   | Advanced |
| 95 | limit 94 to (editorial or letter or "review")   | 134   | Advanced |
| 96 | 94 not 95                                       | 400   | Advanced |
| 97 | limit 96 to yr="1990 -Current"                  | 400   | Advanced |

### ***Original & Updated Searches***

Executed: April 2010; February 2015

Databases: Medline

fMRI Brain Surgery - 1950 to April Week 3 2010; January 2010 to February 2015

1 (function\$ adj2 MRI).mp. (3928)

2 f-MRI.mp. (73)

3 fMRI.mp. (11948)

4 Magnetic Resonance Spectroscopy/ (109471)  
5 limit 4 to yr="1966 - 1987" (25626)  
6 (function\$ adj2 MR imag\$).mp. (581)  
7 magnetic resonance imaging/ or diffusion magnetic resonance imaging/ or echo-planar  
imaging/ (212392)  
8 ((magnetic resonance adj2 imag\$) or (diffusion adj2 magnetic resonance adj2 imag\$) or  
(echo-planar adj2 imag\$)).mp. (238822)  
9 1 or 2 or 3 or 5 or 6 or 7 or 8 (262730)  
10 Brain Mapping/ (50362)  
11 ((brain or cortical) adj2 mapping).mp. (50868)  
12 10 or 11 (50868)  
13 9 and 12 (15771)  
14 brain neoplasms/ or cerebral ventricle neoplasms/ or choroid plexus neoplasms/ or  
papilloma, choroid plexus/ or infratentorial neoplasms/ or brain stem neoplasms/ or cerebellar  
neoplasms/ or neurocytoma/ or pinealoma/ or supratentorial neoplasms/ or hypothalamic  
neoplasms/ or pallister-hall syndrome/ or pituitary neoplasms/ (99357)  
15 Glioma/ (23243)  
16 limit 15 to yr="1994 - 1999" (4202)  
17 choroid plexus/ (4065)  
18 limit 17 to yr="1990 - 1991" (226)  
19 neuroblastoma/ (20867)  
20 limit 19 to yr="1990 - 1993" (2574)  
21 ((brain adj2 neoplasm?) or (cerebral ventricle adj2 neoplasm?) or (choroid plexus adj2  
neoplasm?) or (papilloma adj2 choroid plexus) or (infratentorial adj2 neoplasm?) or (brain stem  
adj2 neoplasm?) or (cerebellar adj2 neoplasm?) or neurocytoma? or pinealoma? or  
(supratentorial adj2 neoplasm?) or (hypothalamic adj2 neoplasm?) or (pallister hall adj2  
syndrome?) or (pituitary adj2 neoplasm?)).tw. (2040)  
22 ((brain adj2 tumour?) or (brain adj2 tumor?) or ((brain or cortical) adj2  
malformation?)).mp. (23963)  
23 14 or 16 or 18 or 20 or 21 or 22 (109952)  
24 Language/ (20253)  
25 language\$.tw. (57226)  
26 speech/ or speech acoustics/ or speech intelligibility/ (19173)  
27 speech\$.tw. (40130)  
28 speech disorders/ or aphasia/ or aphasia, broca/ or aphasia, conduction/ or aphasia, primary  
progressive/ or primary progressive nonfluent aphasia/ or aphasia, wernicke/ or articulation  
disorders/ or dysarthria/ or echolalia/ or mutism/ or stuttering/ (22387)  
29 (aphasia\$ or (articulation adj2 disorder?) or dysarthria? or echolalia? or mutism or  
stuttering).tw. (13327)  
30 language disorders/ or agraphia/ or anomia/ or dyslexia/ or dyslexia, acquired/ or alexia,  
pure/ or language development disorders/ (14725)  
31 (agraphia? or anomia? or dyslexia? or (dyslexia adj2 acquired) or (alexia adj2 pure)).tw.  
(3680)

32 24 or 25 or 26 or 27 or 28 or 29 or 30 or 31 (129301)  
33 exp Neurosurgical Procedures/ (122933)  
34 (brain adj2 surger\$.tw. (1256)  
35 (neurosurgical adj2 procedure?).mp. (11803)  
36 9 and 23 and 32 and 35 (70)  
37 33 or 34 or 35 (124760)  
38 9 and 23 and 32 and 37 (135)  
39 13 and 32 and 37 (114)  
40 memory/ or deja vu/ or memory, short-term/ or mental recall/ or "recognition  
(psychology)"/ or "retention (psychology)"/ (75451)  
41 (memory or memories or deja vu or (short-term adj2 memory) or (short-term adj2  
memories) or (mental adj2 recall) or recognition or retention).mp. (397726)  
42 40 or 41 (397726)  
43 13 and 37 and 42 (56)  
44 9 and 23 and 37 and 42 (89)  
45 38 or 39 or 43 or 44 (300)  
46 limit 45 to (humans and yr="1990 -Current") (293)  
47 limit 46 to (comment or editorial or letter or "review") (49)  
48 46 not 47 (244)

### ***Original & Updated Searches***

Executed: April 2010; February 2015  
Databases: Medline

fMRI Epilepsy - 1950 to April Week 3 2010; January 2010 to February 2015

1 (function\$ adj2 MRI).mp. (3928)  
2 f-MRI.mp. (73)  
3 fMRI.mp. (11948)  
4 Magnetic Resonance Spectroscopy/ (109471)  
5 limit 4 to yr="1966 - 1987" (25626)  
6 (function\$ adj2 MR imag\$).mp. (581)  
7 magnetic resonance imaging/ or diffusion magnetic resonance imaging/ or echo-planar  
imaging/ (212392)  
8 ((magnetic resonance adj2 imag\$) or (diffusion adj2 magnetic resonance adj2 imag\$) or  
(echo-planar adj2 imag\$)).mp. (238822)  
9 1 or 2 or 3 or 5 or 6 or 7 or 8 (262730)  
10 eeg.mp. (42284)  
11 electroencephalography/ (101558)  
12 electroencephalogra\$.mp. (106887)  
13 or/10-12 (113028)  
14 9 and 13 (8251)  
15 epilepsy/ or epilepsies, partial/ or epilepsy, complex partial/ or epilepsy, frontal lobe/ or  
epilepsy, partial, motor/ or epilepsy, partial, sensory/ or epilepsy, rolandic/ or epilepsy, temporal

lobe/ or epilepsy, post-traumatic/ or seizures/ (95830)  
 16 EPILEPSY, TRAUMATIC/ (936)  
 17 limit 16 to yr="1990 - 1991" (46)  
 18 (epileps\$ or seizure\$).mp. [mp=title, original title, abstract, name of substance word,  
 subject heading word, unique identifier] (131025)  
 19 exp neurosurgical procedures/ (122933)  
 20 (neurosurgical adj2 procedure?).mp. (11803)  
 21 15 or 17 or 18 (131025)  
 22 (WADA adj2 test\$).mp. (331)  
 23 (intracarotid adj2 amobarbital adj2 procedure?).mp. (152)  
 24 (intra-carotid adj2 amytal adj2 procedure?).mp. (1)  
 25 language/ (20253)  
 26 language\$.tw. (57226)  
 27 speech/ or speech acoustics/ or speech intelligibility/ (19173)  
 28 speech\$.tw. (40130)  
 29 speech disorders/ or aphasia/ or aphasia, broca/ or aphasia, conduction/ or aphasia, primary  
 progressive/ or primary progressive nonfluent aphasia/ or aphasia, wernicke/ or articulation  
 disorders/ or dysarthria/ or echolalia/ or mutism/ or stuttering/ (22387)  
 30 (aphasia\$ or (articulation adj2 disorder?) or dysarthria? or echolalia? or mutism or  
 stuttering).tw. (13327)  
 31 language disorders/ or agraphia/ or anomia/ or dyslexia/ or dyslexia, acquired/ or alexia,  
 pure/ or language development disorders/ (14725)  
 32 (agraphia? or anomia? or dyslexia? or (dyslexia adj2 acquired) or (alexia adj2 pure)).tw.  
 (3680)  
 33 25 or 26 or 27 or 28 or 29 or 30 or 31 or 32 (129301)  
 34 22 or 23 or 24 (456)  
 35 9 and 21 and 33 and 34 (101)  
 36 memory/ or deja vu/ or memory, short-term/ or mental recall/ or "recognition  
 (psychology)"/ or "retention (psychology)"/ (75451)  
 37 (memory or memories or deja vu or (short-term adj2 memory) or (short-term adj2  
 memories) or (mental adj2 recall) or recognition or retention).mp. (397726)  
 38 36 or 37 (397726)  
 39 9 and 21 and 34 and 38 (64)  
 40 14 and 21 and 33 (355)  
 41 35 or 39 or 40 (452)  
 42 limit 41 to (humans and yr="1990 -Current") (444)  
 43 limit 42 to (comment or editorial or letter or "review") (66)  
 44 42 not 43 (378)

---

***Original & Updated Searches***

Executed: April 2010; February 2015

Databases: Web of Science

fMRI Brain Surgery – 1990 to 2010; January 2010 to February 2015

---

Combined all combined results limited to Journal Articles, 1990-2010

# 12      33      #10 OR #9 OR #8 OR #7  
  
Refined by: [excluding] Conference Titles=( 3RD INTERNATIONAL WORKSHOP ON MEDICAL IMAGING AND AUGMENTED REALITY (MIAR 2006) OR 55TH CONGRESS OF THE SOCIETE-DE-NEUROCHIRURGIE-DE-LANGUE-FRANCAISE OR XIITH MEETING OF THE WORLD SOCIETY FOR STEREOTACTIC AND FUNCTIONAL NEUROSURGERY OR 44TH ANNUAL MEETING OF THE AMERICAN-SOCIETY-OF-NEURORADIOLOGY ) AND [excluding] Document Type=( REVIEW )  
  
Databases=SCI-EXPANDED Timespan=1990-2010

Combined all combined results

# 11      43      #10 OR #9 OR #8 OR #7  
  
Databases=SCI-EXPANDED Timespan=1990-2010

Combined results (fMRI & Brain Tumour & Brain Surgery & Memory)

# 10      3      #6 AND #5 AND #2 AND #1  
  
Databases=SCI-EXPANDED Timespan=1990-2010

Combined Results (fMRI & Brain Mapping & Brain Surgery & Memory)

# 9      5      #6 AND #5 AND #3 AND #1  
  
Databases=SCI-EXPANDED Timespan=1990-2010

Combined Results (fMRI & Brain Mapping & Language & Brain Surgery)

#8      34      #5 AND #4 AND #2 AND #1  
  
Databases=SCI-EXPANDED Timespan=1990-2010

Combined Results (fMRI & Brain Tumour & Language & Brain Surgery)

# 7      23      #5 AND #4 AND #3 AND #1  
  
Databases=SCI-EXPANDED Timespan=1990-2010

Memory Component

# 6 >100,000 Topic=((memory OR memories OR deja vu OR (short-term SAME memory) OR (short-term SAME memories) OR (mental SAME recall) OR recognition OR retention))

Databases=SCI-EXPANDED Timespan=1990-2010

#### Brain Surgery Component

# 5 4,4798 Topic=((brain SAME surger\*) OR (neurosurgical SAME procedure?))

Databases=SCI-EXPANDED Timespan=1990-2010

#### Language Component

# 4 >100,000 Topic=((aphasia\* OR (articulation SAME disorder?)) OR dysarthria? OR echolalia? OR mutism OR stuttering OR agraphia? OR anomia? OR dyslexia? OR (dyslexia SAME acquired) OR (alexia SAME pure) OR speech\* OR language\*)

Databases=SCI-EXPANDED Timespan=1990-2010

#### Brain Tumour Component

# 3 29,472 Topic=((brain SAME (neoplasm? OR tumo\$r?)) OR (cerebral ventricle SAME (neoplasm? OR tumo\$r?)) OR (choroid plexus SAME (neoplasm? OR tumo\$r?)) OR (papilloma SAME choroid plexus) OR (infratentORial SAME (neoplasm? OR tumo\$r?)) OR (brain stem SAME (neoplasm? OR tumo\$r?)) OR (cerebellar SAME (neoplasm? OR tumo\$r?)) OR neurocytoma? OR pinealoma? OR (supratentORial SAME (neoplasm? OR tumo\$r?)) OR (hypothalamic SAME (neoplasm? OR tumo\$r?)) OR (pallister hall SAME syndrome?) OR (pituitary SAME (neoplasm? OR tumo\$r?)) OR ((brain OR cortical) SAME malformation?))

Databases=SCI-EXPANDED Timespan=1990-2010

#### Brain Mapping Component

# 2 4,459 Topic=(((brain or cortical) SAME mapping))

Databases=SCI-EXPANDED Timespan=1990-2010

#### fMRI Component

# 1 >100,000 Topic=((function\* SAME MRI) OR f-MRI OR fMRI OR (function\* SAME MR imag\*) OR (magnetic resonance SAME imag\*) or (diffusion SAME magnetic resonance SAME imag\*) OR (echo-planar SAME imag\*))  
 Databases=SCI-EXPANDED Timespan=1990-2010

***Original & Updated Searches***

Executed: April 2010; February 2015  
 Databases: Web of Science

fMRI Epilepsy – 1990 to 2010; January 2010 to February 2015

Set Results

- |      |          |                                                                                                                                                                                                                                                                                                               |
|------|----------|---------------------------------------------------------------------------------------------------------------------------------------------------------------------------------------------------------------------------------------------------------------------------------------------------------------|
| # 10 | 914      | #8 AND #4 AND #3<br><br>Refined by: [excluding] Document Type=( PROCEEDINGS PAPER OR NOTE OR REVIEW OR MEETING ABSTRACT OR EDITORIAL MATERIAL )<br><br>Databases=SCI-EXPANDED Timespan=1990-2010                                                                                                              |
| # 9  | 1,185    | #8 AND #4 AND #3<br><br>Databases=SCI-EXPANDED Timespan=1990-2010                                                                                                                                                                                                                                             |
| # 8  | >100,000 | #7 OR #6 OR #5<br><br>Databases=SCI-EXPANDED Timespan=1990-2010                                                                                                                                                                                                                                               |
| # 7  | >100,000 | Topic=(memory OR memories OR deja vu OR (mental SAME recall*) OR recognition? OR retention?)<br><br>Databases=SCI-EXPANDED Timespan=1990-2010                                                                                                                                                                 |
| # 6  | >100,000 | Topic=(language* OR agraphia* OR anomia* OR dyslexia* OR alexia* OR (vocabulary SAME test?) OR speech* OR aphasia* OR (articulat* SAME disorder?) OR (verbal SAME disorder?) OR dysarthria* OR echolalia* OR mutis* OR stutter* OR (verbal SAME behavio*r?))<br><br>Databases=SCI-EXPANDED Timespan=1990-2010 |
| # 5  | 8,329    | Topic=(wada* OR amobarbital* OR amytal* OR (diagnost* SAME neurologic*) OR (neuropsychologic* SAME test?))                                                                                                                                                                                                    |

- Databases=SCI-EXPANDED Timespan=1990-2010
- # 4 >100,000 Topic=(epilep\* OR seizur\* OR convuls\*)  
Databases=SCI-EXPANDED Timespan=1990-2010
- # 3 >100,000 #2 OR #1  
Databases=SCI-EXPANDED Timespan=1990-2010
- # 2 59,583 Topic=((echoplanar SAME imag\*) OR (function\* SAME imag\*) OR (function\* SAME MR imag\*) OR (function\* SAME mri?) OR fmri OR f-mri)  
Databases=SCI-EXPANDED Timespan=1990-2010
- # 1 >100,000 Topic=((magnetic resonance SAME imag\*) OR (diffusion SAME imag\*) OR (diffusion SAME mri) OR (mr SAME tomograph\*) OR (nmr SAME imag\*) OR (echo planar SAME imag\*))  
Databases=SCI-EXPANDED Timespan=1990-2010

## **Appendix e-4. AAN rules for classification of evidence for risk of bias**

### ***Diagnostic accuracy scheme***

#### *Class I*

A cohort study with prospective data collection of a broad spectrum of persons with the suspected condition, using an acceptable reference standard for case definition. The diagnostic test is objective or performed and interpreted without knowledge of the patient's clinical status. Study results allow calculation of measures of diagnostic accuracy.

#### *Class II*

A case-control study of a broad spectrum of persons with the condition established by an acceptable reference standard compared with a broad spectrum of controls, or a cohort study with a broad spectrum of persons with the suspected condition where the data were collected retrospectively. The diagnostic test is objective or performed and interpreted without knowledge of disease status. Study results allow calculation of measures of diagnostic accuracy.

#### *Class III*

A case-control study or cohort study where either persons with the condition or controls are of a narrow spectrum. The condition is established by an acceptable reference standard. The reference standard and diagnostic test are objective or performed and interpreted by different observers. Study results allow calculation of measures of diagnostic accuracy.

#### *Class IV*

Studies not meeting Class I, II, or III criteria, including consensus, expert opinion, or a case report.

### ***Prognostic accuracy scheme***

#### *Class I*

A cohort study of a broad spectrum of persons at risk for developing the outcome (e.g., target disease, work status). The outcome is defined by an acceptable reference standard for case definition. The outcome is objective or measured by an observer who is masked to the presence of the risk factor. Study results allow calculation of measures of prognostic accuracy.

*Class II*

A case-control study of a broad spectrum of persons with the condition compared with a broad spectrum of controls, or a cohort study of a broad spectrum of persons at risk for the outcome (e.g., target disease, work status) where the data were collected retrospectively. The outcome is defined by an acceptable reference standard for case definition. The outcome is objective or measured by an observer who is masked to the presence of the risk factor. Study results allow calculation of measures of prognostic accuracy.

*Class III*

A case-control study or a cohort study where either the persons with the condition or the controls are of a narrow spectrum where the data were collected retrospectively. The outcome is defined by an acceptable reference standard for case definition. The outcome is objective or measured by an observer who did not determine the presence of the risk factor. Study results allow calculation of measures of a prognostic accuracy.

*Class IV*

Studies not meeting Class I, II, or III criteria, including consensus, expert opinion, or a case report.

## **Appendix e-5. Classification of recommendations**

A = Established as effective, ineffective, or harmful (or established as useful/predictive or not useful/predictive) for the given condition in the specified population. (Level A rating requires at least two consistent Class I studies.)\*

B = Probably effective, ineffective, or harmful (or probably useful/predictive or not useful/predictive) for the given condition in the specified population. (Level B rating requires at least one Class I study or two consistent Class II studies.)

C = Possibly effective, ineffective, or harmful (or possibly useful/predictive or not useful/predictive) for the given condition in the specified population. (Level C rating requires at least one Class II study or two consistent Class III studies.)

U = Data inadequate or conflicting; given current knowledge, treatment (test, predictor) is unproven.

\*In exceptional cases, one convincing Class I study may suffice for an “A” recommendation if 1) all criteria are met, 2) the magnitude of effect is large (relative rate improved outcome  $> 5$  and the lower limit of the confidence interval is  $> 2$ ).
