# Supplementary material
Source: PubMed Central journal article supplement (PMC5272968)
Supplement: supp_WNL.0000000000003532_Table_e-1_fMRI_evidence.pdf [file supp_WNL.0000000000003532_Table_e-1_fMRI_evidence.pdf]

Table e-1. fMRI evidence

| First author, y                      | Class | Group Size | Subject Characteristics                                                                                                                    | Brain Function Localized | fMRI task                                                                                          | Outcome Measures                                                                     | Results/Complications/Comments                                                                                                                                                                                                                                                                                                                                                              | IAP                               |
|--------------------------------------|-------|------------|--------------------------------------------------------------------------------------------------------------------------------------------|--------------------------|----------------------------------------------------------------------------------------------------|--------------------------------------------------------------------------------------|---------------------------------------------------------------------------------------------------------------------------------------------------------------------------------------------------------------------------------------------------------------------------------------------------------------------------------------------------------------------------------------------|-----------------------------------|
| <b>LANGUAGE STUDIES</b>              |       |            |                                                                                                                                            |                          |                                                                                                    |                                                                                      |                                                                                                                                                                                                                                                                                                                                                                                             |                                   |
| Adcock et al., 2003 <sup>e19</sup>   | III   | 19         | L TLE = 12 (8 w/MTS; 4 w/other)<br>R TLE = 7 (4 w/MTS; 3 w/DNET)                                                                           | language                 | Verbal fluency / visual fixation                                                                   | Agreement w/IAP<br>fMRI repeatability                                                | "Good" agreement between fMRI and IAP in language lateralization but fMRI "more sensitive" to bilateral language lateralization<br>Correlation between fMRI studies in language lateralization r=0.65; p<0.0001                                                                                                                                                                             | Incomplete description            |
| Arora et al., 2009 <sup>e15</sup>    | II    | 40*        | L hemispheric = 24<br>R hemispheric = 16                                                                                                   | language                 | Reading sentence comprehension<br>Auditory sentence comprehension<br>Verbal fluency                | Agreement w/IAP<br>Comprehensive language panel (3 tasks)                            | *not all participants had all tasks<br>31 w/IAP (concordant w/fMRI reading comprehension task in 83.9%; w/auditory comprehension task in 83.3%; w/verbal fluency in 76.9%); conjunction analysis – 91.3% agreement between fMRI and IAP                                                                                                                                                     | Complete description provided     |
| Benke et al., 2006 <sup>e20</sup>    | III   | 68         | R TLE = 28 (24 medial; 4 neocortical); variable etiologies combined<br>L TLE = 40 (31 medial; 9 neocortical); variable etiologies combined | language                 | SDTD (adapted from Binder et al., 1996)                                                            | Agreement w/IAP                                                                      | R TLE – 89.5%<br>L TLE – 72.5%                                                                                                                                                                                                                                                                                                                                                              | Complete description provided     |
| Binder et al., 1996 <sup>e21</sup>   | III   | 22         | NL MRI = 13<br>L T "sclerotic changes" = 4<br>T L cavernoma = 2<br>L hemispheric encephalomalacia = 3                                      | language                 | SDTD                                                                                               | Agreement w/IAP                                                                      | Correlation coefficient with IAP r = 0.96                                                                                                                                                                                                                                                                                                                                                   | Complete description provided     |
| Binder et al., 2010 <sup>e22</sup>   | II    | 67         | L ATL = 30<br>R ATL = 37                                                                                                                   | language memory          | SDTD, scene encoding/scrambled scene pairs                                                         | Language lateralization vs. hippocampal activation as predictors of surgical outcome | Preoperative language lateralization correlated with postoperative verbal memory change (multiple measures and multiple ROIs).<br>Hippocampal activation asymmetry was strongly related to side of seizure focus and to IAP memory asymmetry but was unrelated to verbal memory outcome (all p>0.05).                                                                                       | Complete description provided     |
| Bonelli et al., 2012 <sup>e36</sup>  | II    | 44         | L TLE = 24 (all HS)<br>R TLE = 20 (all HS)                                                                                                 | language                 | Verbal fluency vs. crosshair fixation (rest)                                                       | 4 months verbal fluency and naming outcomes                                          | Pre-op better naming correlated with better LH and LF activation. In LTLE, stronger LF activation predicted greater post-resection decline; post-resection performance depended on greater RF shift. In RTLE better post-resection performance was associated with greater LF and LH activation.                                                                                            | N/A                               |
| Chlebus et al., 2007 <sup>e23</sup>  | III   | 15         | L TLE = 12 (11 w/MTS)<br>R TLE = 3 (2 w/MTS)                                                                                               | language                 | Letter fluency vs. rest                                                                            | Agreement w/IAP                                                                      | Correlation coefficient with IAP r = 0.94 for Broca's area                                                                                                                                                                                                                                                                                                                                  | Complete description provided     |
| Deblaere et al., 2004 <sup>e24</sup> | I     | 20*        | L MTS = 8; L lesion (T neocortical) = 3<br>R MTS = 5; R lesion (T neocortical) = 2<br>NL MRI = 2                                           | language                 | Word chain task vs. counting                                                                       | Agreement w/IAP                                                                      | Agreement between IAP and fMRI = 100% including 2 with atypical language lateralization<br>*17 available for comparison but not clear which patients had IAP                                                                                                                                                                                                                                | Complete description provided     |
| Ellmore et al., 2010 <sup>e25</sup>  | III   | 23         | L TLE = 19<br>R TLE = 4<br>17/23 w/TLE; 4/23 with seizure onset other than medial temporal                                                 | language                 | Four language tasks: naming of line drawings, naming of faces, action naming, word stem completion | Prediction of seizure and language lateralization                                    | After a multiple comparison correction three variables were found to have significant and independent predictive power for determining Wada outcome: Broca's area fMRI activity, handedness, and the DTI of AF.<br>Test of predictive power based on a model using all three variables was correctly classified the dominant hemisphere in 22 of 23 (95.6%) patients based on Wada outcome. | Only minimal IAP details provided |
| Gaillard et al., 2002 <sup>e8</sup>  | II    | 30*        | L hemispheric focus = 18<br>R hemispheric focus = 121<br>2 NL MRI, 12 MTS (which side?); rest other lesions/abnormalities                  | language**               | Naming to description / patterns of dots                                                           | Agreement w/IAP                                                                      | *21 available for comparison between IAP and fMRI<br>**Inter-rater agreement between fMRI readers 0.71-0.77 (Cramer V)<br>22/25 IAP and fMRI congruent<br>3/25 IAP and fMRI partially congruent                                                                                                                                                                                             | Only minimal IAP details provided |
| Gaillard et al., 2004 <sup>e16</sup> | II    | 26         | L MTS = 7<br>L lesion = 3<br>R MTS = 7<br>R lesion = 2<br>MRI NL = 7 (R T or FT = 3; L T or FT = 4)                                        | language                 | Three tasks: verbal fluency, reading and auditory comprehension                                    | Agreement w/IAP                                                                      | 21/25 fMRI and IAP agreed in LI<br>3/25 partial disparity between fMRI and LI<br>1/25 failed IAP<br>Agreement between raters Cramer V = 0.93 for all three tasks vs. Cramer V = 0.72 for any single task                                                                                                                                                                                    | Complete description provided     |
| Gutbrod et al., 2012 <sup>e26</sup>  | II    | 20         | 12 w/epilepsy<br>8 w/tumors                                                                                                                | language                 | Letter-decision, rhyme-decision, synonym-decision, sentence-decision                               | Agreement w/IAP and interrater agreement                                             | Interrater agreement was 0.90 for IF and 0.97 for ST activations; correlation with IAP was 0.86 for sentence and 0.89 for synonym task                                                                                                                                                                                                                                                      | Complete description provided     |
| Janecek et al., 2013 <sup>e57</sup>  | I     | 229        | 91 RT onset<br>97 LT onset<br>41 Extra-T onset                                                                                             | language                 | SDTD, scene encoding/scrambled scene pairs                                                         | Agreement w/IAP                                                                      | Discordant results in 14%; discordance highest in the "bilateral" group; the only factor that predicted discordance was the degree of atypical language lateralization;<br>Discordant results in 14%                                                                                                                                                                                        | Complete description provided     |

|                                                                                                                                              |     |      |                                                                                                                                                                                                       |                 |                                                                                                    |                                                                                      |                                                                                                                                                                                                                                                                                                                                      |                                              |
|----------------------------------------------------------------------------------------------------------------------------------------------|-----|------|-------------------------------------------------------------------------------------------------------------------------------------------------------------------------------------------------------|-----------------|----------------------------------------------------------------------------------------------------|--------------------------------------------------------------------------------------|--------------------------------------------------------------------------------------------------------------------------------------------------------------------------------------------------------------------------------------------------------------------------------------------------------------------------------------|----------------------------------------------|
| Jones et al., 2011 <sup>e27</sup>                                                                                                            | II  | 51   | 34 w/epilepsy<br>17 w/brain tumors<br>(based on Table 5)                                                                                                                                              | language        | Covert word generation, rhyming, passive listening                                                 | Agreement with IAP lateralization                                                    | Correlation between objective measure of language lateralization and LI score was $r^2=0.46$ .<br>59 enrolled; Some patients received fMRI twice and some tasks were repeated "at the discretion of the MR technologist"; some had incomplete IAP                                                                                    | Only minimal IAP details provided            |
| Kamada et al., 2007 <sup>e28</sup>                                                                                                           | III | 117* | *87 with various lesions underwent IAP, fMRI and MEG (tumors, vascular lesions, etc.)                                                                                                                 | language        | Two tasks: VGT (control: words played backwards) and abstract/concrete words categorization (dots) | Agreement w/IAP                                                                      | 90.1% agreement with fMRI verb generation<br>Abstract/concrete words categorization task – "unsuitable for language mapping"                                                                                                                                                                                                         | Complete description provided                |
| Ota et al., 2011 <sup>e30</sup>                                                                                                              | II  | 28   | 13 – epilepsy (8 LTE; 5 RTE)<br>13 – brain tumors<br>2 - AVM                                                                                                                                          | language        | Kana reading task                                                                                  | Agreement w/IAP (and other non-invasive measures)                                    | In left lateralized language; 95% sensitivity and 87.5 specificity; 3 patients were right-lateralized by IAP – no fMRI concordance                                                                                                                                                                                                   | Not provided                                 |
| Rodin et al., 2013 <sup>e31</sup>                                                                                                            | II  | 20   | Mixed onset and pathology w/typical distribution for pediatric epilepsy                                                                                                                               | language        | Panel of 7 language tasks                                                                          | Agreement with IAP (7), ESM (17) and both (4)                                        | IAP – 57% concordance in F and 43% in T regions (visual analysis; lower with LI use) using fMRI and ESM data; there were no discordant cases                                                                                                                                                                                         | Complete description provided                |
| Rutten et al., 2002 <sup>e32</sup>                                                                                                           | III | 18   | L hemispheric = 16 (10 w/MTS; 6 with other lesions)<br>R TLE = 2                                                                                                                                      | language        | Battery of 4 tasks: VGT, verbal fluency, picture naming, sentence comprehension                    | Agreement w/IAP                                                                      | A combined task analysis and use of anatomically pre-defined volumes-of-interest led to LI calculation. The combined task analysis was, retrospectively, more robust than any given task. Concordance was found in 10/11 left-IAP, 3/4 bilateral IAP, and 2 of 3 right-IAP patients. Best agreement with verb generation fMRI        | Complete description provided                |
| Sabbah et al., 2003 <sup>e33</sup>                                                                                                           | III | 20   | L hemispheric = 11 (L TLE = 6)<br>R hemispheric = 9 (R TLE = 7)                                                                                                                                       | language        | Two semantic fluency paradigms                                                                     | Agreement w/IAP                                                                      | Agreement in LI in 19/20 patients. This includes 7/8 right dominant patients. The one incongruent case was correctly lateralized but weaker than pre-defined threshold.                                                                                                                                                              | Complete description provided                |
| Sabsevitz et al., 2003 <sup>e34</sup>                                                                                                        | III | 56   | L TLE = 24<br>R TLE = 32                                                                                                                                                                              | language        | SDTD                                                                                               | Agreement w/IAP<br>Language outcome                                                  | Agreement between IAP and fMRI $r>0.65$ for all measures (all $p<0.001$ )<br>fMRI LI was 100% sensitive and 73% specific for post-surgical naming decline                                                                                                                                                                            | Complete description provided                |
| Szafiarski et al., 2008 <sup>e18</sup>                                                                                                       | II  | 38*  | L medial temporal = 8<br>L temporal (presumably neocortical) = 3<br>L extra-temporal = 2<br>R medial temporal = 9<br>R temporal (presumably neocortical) = 4<br>R extratemporal = 1<br>Bitemporal = 1 | language        | SDTD and VGT                                                                                       | Agreement w/IAP<br>Compare VGT and SDTD                                              | *28/38 underwent IAP<br>Both tasks generated laterality indices using pre-defined regions-of-interest. The LI index for SDTD and VGT correlated with IAP ( $r=0.65$ and $r=0.735$ , each $p<0.001$ , respectively) This included 5 atypical IAP results.                                                                             | Complete description provided                |
| Woermann et al., 2003 <sup>e35</sup>                                                                                                         | III | 100  | L hemispheric = 82 (63 w/TLE)<br>R hemispheric = 18 (11 w/TLE)                                                                                                                                        | language        | Word generation vs. rest                                                                           | Agreement w/IAP                                                                      | Overall discordance between fMRI and IAP LI was 9%. In patients with left extra-temporal epilepsy it was 25%. False categorization was 3% for L TLE and 25% (4/16) L extra-temporal epilepsy. 3/29 atypical IAP were falsely categorized by fMRI.                                                                                    | Minimal description of IAP                   |
| <b>MEMORY STUDIES</b>                                                                                                                        |     |      |                                                                                                                                                                                                       |                 |                                                                                                    |                                                                                      |                                                                                                                                                                                                                                                                                                                                      |                                              |
| Binder et al., 2008 <sup>e44</sup>                                                                                                           | II  | 122  | L ATL = 60<br>R ATL = 62                                                                                                                                                                              | verbal memory   | SDTD                                                                                               | Postsurgical memory                                                                  | 50% of postsurgical memory outcome was explained by NPT<br>10% by fMRI                                                                                                                                                                                                                                                               | IAP of language or memory did not contribute |
| Binder et al., 2010 <sup>e22</sup>                                                                                                           | II  | 67   | L ATL = 30<br>R ATL = 37                                                                                                                                                                              | language memory | SDTD, scene encoding/scrambled scene pairs                                                         | Language lateralization vs. hippocampal activation as predictors of surgical outcome | Preoperative language lateralization correlated with postoperative verbal memory change (multiple measures and multiple ROIs).<br>Hippocampal activation asymmetry was strongly related to side of seizure focus and to IAP memory asymmetry but was unrelated to verbal memory outcome (all $p>0.05$ ).                             | Complete description provided                |
| Bonelli, S et al., 2010 <sup>e12</sup><br>(subset from this study was published earlier – Powell et al., 2007 thus older study not included) | II  | 72*  | L TLE = 41 (40 w/MTS; 1 cavernoma)<br>R TLE = 31 (28 w/MTS; 1 cavernoma; 1 dysplasia; 1 DNET)                                                                                                         | memory          | Encoding of faces, pictures, and words (event related)                                             | Verbal and visual memory                                                             | Preoperative memory fMRI was the strongest predictor of postoperative verbal and visual memory decline;<br>*54 had surgery                                                                                                                                                                                                           | N/A                                          |
| Bonelli et al., 2013 <sup>e38</sup>                                                                                                          | II  | 46   | 25/26 LHS<br>16/20 RHS                                                                                                                                                                                | memory          | Encoding of faces, pictures, and words (event related)                                             | Verbal and visual memory                                                             | LTLE: greater pre-operative posterior H activation was associated with better post-resection verbal memory outcome; greater post- then preoperative activation was associated with worse outcome. RTLE: this was not observed. Conclusion – reorganization to the posterior temporal lobe pre-resection predicts good post-resection | N/A                                          |

|                                                                                                                                                     |     |     |                                                                                                                                                                                                                       |                 |                                                                          |                                                     |                                                                                                                                                                                                                                                                                                                                                                                                                                                                                                                                                                                                                                                                                                                                         |                                                                                                                                                                                  |
|-----------------------------------------------------------------------------------------------------------------------------------------------------|-----|-----|-----------------------------------------------------------------------------------------------------------------------------------------------------------------------------------------------------------------------|-----------------|--------------------------------------------------------------------------|-----------------------------------------------------|-----------------------------------------------------------------------------------------------------------------------------------------------------------------------------------------------------------------------------------------------------------------------------------------------------------------------------------------------------------------------------------------------------------------------------------------------------------------------------------------------------------------------------------------------------------------------------------------------------------------------------------------------------------------------------------------------------------------------------------------|----------------------------------------------------------------------------------------------------------------------------------------------------------------------------------|
|                                                                                                                                                     |     |     |                                                                                                                                                                                                                       |                 |                                                                          |                                                     | outcome. Post-surgical reorganization does not imply better performance.                                                                                                                                                                                                                                                                                                                                                                                                                                                                                                                                                                                                                                                                |                                                                                                                                                                                  |
| Cheung et al., 2009 <sup>e45</sup>                                                                                                                  | II  | 17  | L TLE = 9 (7 w/MTS; 1 glioma, 1 cavernoma)<br>RTLE = 8 (3 w/MTS; 4 with lesions, 1 normal)                                                                                                                            | memory          | Novel visual scene encoding vs. visual fixation                          | Postsurgical memory                                 | Preoperative fMRI activation was associated with postoperative memory outcomes                                                                                                                                                                                                                                                                                                                                                                                                                                                                                                                                                                                                                                                          | N/A                                                                                                                                                                              |
| Deblaere et al., 2005 <sup>e39</sup>                                                                                                                | III | 17  | L TLE = 7<br>R TLE = 9                                                                                                                                                                                                | memory          | Picture encoding/recall                                                  | Agreement w/IAP                                     | Correlation ( $p < 0.001$ ) between R TLE IAP and fMRI but not L TLE ( $p > 0.1$ )                                                                                                                                                                                                                                                                                                                                                                                                                                                                                                                                                                                                                                                      | Complete description provided                                                                                                                                                    |
| Dupont et al., 2010 <sup>e41</sup>                                                                                                                  | II  | 25  | R MTLE = 14<br>L MTLE = 11<br>(23 with unilateral lesions "mostly MTS"; one with bilateral lesion and one with no lesion)                                                                                             | memory          | Three fMRI tasks – the most important one was delayed memory recognition | Agreement w/IAP and postsurgical memory outcome     | No correlation between fMRI and IAP LI in 19/25 patients ( $p = 0.152$ )<br>Pre-to-post surgery change in verbal memory correlated with L fMRI activation during delayed recognition ( $p = 0.009$ ) and pre-op verbal memory score ( $p < 0.001$ ).<br>Delayed recall task predictive of verbal memory outcomes after left temporal lobectomy but not predictive of non-verbal memory outcomes after right temporal lobectomy.<br>Overall fMRI better than IAP in predicting outcome after left temporal lobectomy.                                                                                                                                                                                                                    | Complete description provided                                                                                                                                                    |
| Frings et al., 2008 <sup>e46</sup>                                                                                                                  | II  | 22* | L TLE = 12 (7 w/MTS; 5 w/other pathologies)<br>R TLE = 10 (6 w/MTS; 4 w/other pathologies)                                                                                                                            | memory          | Visual spatial memory/visual size comparison                             | Postsurgical memory                                 | *available in 15 patients<br>Correlation between postsurgical verbal learning deterioration and ipsilateral resection ( $\rho = 0.49$ ; $p < 0.05$ )                                                                                                                                                                                                                                                                                                                                                                                                                                                                                                                                                                                    | N/A                                                                                                                                                                              |
| Janecek et al., 2013 <sup>e17</sup>                                                                                                                 | I   | 229 | L TLE = 97<br>R TLE = 91<br>Extra-temporal (L and R) = 41                                                                                                                                                             | language        | SDTD                                                                     | Agreement w/IAP                                     | Discordant rates were observed in 14% with 8% in patients w/L language lateralization, 40% in bilateral, and 33% in right.<br>fMRI contributed to 22-26% of variance in LI data while IAP contributed 2-5% - most of variance in the data is accounted for by fMRI.                                                                                                                                                                                                                                                                                                                                                                                                                                                                     | Complete description available                                                                                                                                                   |
| Jokeit et al., 2001 <sup>e42</sup>                                                                                                                  | III | 30  | L TLE = 16 (10 w/MTS; 6 w/other pathologies)<br>R TLE = 14 (7 w/MTS; 7 w/other pathologies)                                                                                                                           | memory          | Home walking task / counting odd numbers back                            | Memory asymmetry prediction and agreement with IAP* | fMRI predicted memory asymmetry correctly in 90% of patients;<br># of activated fMRI L hippocampal voxels correlated in L TLE with L IAP score ( $p < 0.01$ ) and R hippocampal voxels with Rey Complex Figure ( $p < 0.05$ )<br>*14 patients bilateral IAP; 4 patients unilateral IAP                                                                                                                                                                                                                                                                                                                                                                                                                                                  | Partial description of IAP                                                                                                                                                       |
| Koylu et al., 2008 <sup>e29</sup>                                                                                                                   | III | 26  | L TLE = 14 (13 w/medial temporal onset)<br>R TLE = 12 (no information on the make-up of this group)                                                                                                                   | language memory | SDTD (adapted from Binder et al., 1997)                                  | Postsurgical outcomes                               | L TLE: Activation in L MTL correlates positively with preoperative verbal memory ability. Activation in R MTL correlates positively with preoperative and postoperative verbal memory ability.<br>R TLE: Activation in R MTL correlates positively with preoperative and postoperative verbal memory.                                                                                                                                                                                                                                                                                                                                                                                                                                   | *all participants were left hemispheric for language by IAP but description of IAP or comparison with fMRI not done; multiple tests done w/o correction for multiple comparisons |
| Mechanic-Hamilton et al., 2009 <sup>e13</sup><br>(subset from this study was published earlier – Rabin et al., 2004 thus older study not included ) | III | 49  | L TLE = 21<br>R TLE = 24<br>Bilateral = 4<br>Lesional or non-lesional TLE (patients with tumors, vascular lesions, prior TBI or extra-temporal epilepsy were excluded)<br>*patients split between 1.5 and 3T scanners | memory          | Scene encoding / scrambled scene pairs                                   | Agreement w/IAP<br>Postsurgical outcomes            | Hippocampal fMRI asymmetry vs. IAP – no correlation<br>Medial temporal ROI – correlated with IAP ( $r = 0.59$ ; $p = 0.001$ )<br>Left TLE: Preoperative activation in left MTL during scene encoding is negatively correlated with pre-to-post change score on a scene encoding recognition task. Preoperative MTL activation is NOT correlated with change on any standard verbal or nonverbal neuropsychological measures.<br>Right TLE: fMRI activation in MTL was not related to any postoperative outcome measures. This conflicts with a previous smaller study by the same group (Rabin et al. 2004), which had suggested that activation in the MTL predicts postop scene encoding ability in both left and right TLE patients. | No IAP description                                                                                                                                                               |
| Sidhu et al., 2015 <sup>e40</sup>                                                                                                                   | II  | 50  | L TLE = 23<br>R TLE = 27                                                                                                                                                                                              | memory          | Encoding of concrete nouns (Event related)                               | Post-resection NPT outcome                          | LTLE: increasing L LI was associated with increasing post-resection verbal memory decline ( $r = 0.44$ ; $p = 0.037$ ); RTLE – no effect. Post-resection outcomes: LTLE – L activations predicted post-surgical memory decline; RTLE – L IFG activations predicted post-resection decline.                                                                                                                                                                                                                                                                                                                                                                                                                                              | N/A                                                                                                                                                                              |
| Vannest et al., 2008 <sup>e43</sup>                                                                                                                 | III | 23  | L hemispheric = 11 (5 w/MTLE)<br>R hemispheric = 12 (6 w/MTLE)                                                                                                                                                        | memory          | Scene encoding / scrambled scene pairs                                   | Memory lateralization and Agreement with NPT        | For L hemispheric focus memory shifted to the R and for R hemispheric focus memory shifted to the L on several measures ( $p < 0.05$ ). Several significant ( $p < 0.05$ ) relationships between fMRI and NPT reported.                                                                                                                                                                                                                                                                                                                                                                                                                                                                                                                 | N/A                                                                                                                                                                              |
| Wagner et al., 2007 <sup>e47</sup>                                                                                                                  | II  | 21  | L TLE = 11 (all HS)<br>R TLE = 10 (all HS)                                                                                                                                                                            | memory          | Word pairs encoding                                                      | Functional connectivity and postsurgical outcome    | Task-correlations between hippocampus and cortical areas was higher in those who subsequently had worse verbal learning ( $p < 0.05$ ).                                                                                                                                                                                                                                                                                                                                                                                                                                                                                                                                                                                                 | N/A                                                                                                                                                                              |

Abbreviations: AF = arcuate fasciculus; ATL = anterior temporal lobe epilepsy; DNET = dysembryoplastic neuroepithelial tumor; DTI = diffusion tensor imaging; IAP = intracarotid amobarbital procedure; LI = laterality index; MTLE = medial temporal lobe epilepsy; MTS = medial temporal sclerosis; NPT = neuropsychological testing; ROI = region of interest; SDTD = semantic decision / tone decision; TLE = temporal lobe epilepsy; VGT = verb generation task.

Citations provided from full-length guideline, published as a data supplement at [Neurology.org](http://Neurology.org).
