# Supplementary material
Source: PubMed Central journal article supplement (PMC5272968)
Supplement: supp_WNL.0000000000003532_Table_e-2_fMRI_vs_IAP.pdf [file supp_WNL.0000000000003532_Table_e-2_fMRI_vs_IAP.pdf]

**Table e-2. Class I and II fMRI-IAP language lateralization comparison studies**

| First author, y                       | Class | N                    | Language task                                                                                                | Baseline                                                   | Brain region examined                  | Concordance               |
|---------------------------------------|-------|----------------------|--------------------------------------------------------------------------------------------------------------|------------------------------------------------------------|----------------------------------------|---------------------------|
| <b>Adcock, 2003</b> <sup>e19</sup>    | II    | 19                   | Silent word generation                                                                                       | Fixation                                                   | Language                               | 100%                      |
| <b>Arora, 2009</b> <sup>e15</sup>     | II    | 37<br>38<br>31<br>28 | Sentence judgment (auditory)<br>Sentence judgment (visual)<br>Silent word generation<br>All tasks combined   | Tone comparison<br>Line comparison<br>Line comparison      | Hemisphere                             | 0%<br>68%<br>65%<br>71%   |
| <b>Benke, 2006</b> <sup>e20</sup>     | I     | 68                   | Semantic decision (auditory)                                                                                 | Tone decision                                              | Frontal lobe<br>Temporal               | 78%<br>69%                |
| <b>Binder, 1996</b> <sup>e21</sup>    | I     | 22                   | Semantic decision (auditory)                                                                                 | Tone decision                                              | Hemisphere                             | 100%                      |
| <b>Chlebus, 2007</b> <sup>e23</sup>   | I     | 15                   | Silent word generation                                                                                       | Rest                                                       | Frontal lobe                           | 100%                      |
| <b>Deblaere, 2004</b> <sup>e24</sup>  | I     | 17                   | Silent word generation                                                                                       | Silent counting                                            | Frontal lobe<br>Hemisphere<br>Temporal | 100%<br>94%<br>82%        |
| <b>Ellmore, 2010</b> <sup>e25</sup>   | II    | 23                   | Silent naming and word generation                                                                            | Fixation                                                   | Frontal lobe                           | 91%                       |
| <b>Gutbrod, 2012</b> <sup>e26</sup>   | II    | 20                   | Rhyme decision<br>Synonym decision<br>Sentence decision                                                      | Letter decision                                            | *Frontal<br>*Temporal<br>*Combined     | 84%–88%<br>82%–84%<br>90% |
| <b>Gaillard, 2004</b> <sup>e16</sup>  | I     | 25                   | Silent word generation<br>+Reading comprehension<br>+Auditory comprehension                                  | Rest<br>Passive visual patterns<br>Rest or reversed speech | Language                               | 84%                       |
| <b>Janacek, 2013</b> <sup>e17</sup>   | II    | 229                  | Semantic decision (auditory)                                                                                 | Tone decision                                              | Language                               | 86%                       |
| <b>Rutten, 2002</b> <sup>e32</sup>    | II    | 18                   | Silent verb generation only<br>Silent verb generation<br>+ Silent object naming<br>+ Silent sentence reading | Shape decision                                             | Language<br><br>Language               | 72%<br><br>83%            |
| <b>Sabbah, 2003</b> <sup>e33</sup>    | II    | 20                   | Silent word generation                                                                                       | Rest                                                       | Hemisphere                             | 95%                       |
| <b>Szafarski, 2008</b> <sup>e18</sup> | II    | 28<br>27             | Silent verb generation<br>Semantic decision (auditory)                                                       | Finger tapping<br>Tone decision                            | Language                               | 82%<br>78%                |

Abbreviations: fMRI = functional MRI; IAP = intracarotid amobarbital procedure

\*Combined for all tasks

Citations provided from full-length guideline, published as a data supplement at Neurology.org
